# Supplementary material for: Indoles induce metamorphosis in a broad diversity of jellyfish, but not in a crown jelly (Coronatae)
Source: PLoS One. 2017 Dec 27;12(12):e0188601. doi: 10.1371/journal.pone.0188601 (PMC5744923; doi:10.1371/journal.pone.0188601)
Supplement: S3 Table — This file is presented in tidy data format, and contains strobilation data for the following species: Aurelia N. Japan line, Chrysaora pacifica, Chrysaora quinquecirrha, Aurelia sp. S. Japan line, Chrysaora fuscescens, and Mastigias papua. This is a comma-separated text file. (CSV) [file pone.0188601.s003.csv]

experiment	species	temperature_c	day	date	num_replicates	drug_concentration_uM	drug_responce
1	Aurelia N. Japan line	22	0	20-May-13	4	50	0
1	Aurelia N. Japan line	22	1	21-May-13	4	50	NA
1	Aurelia N. Japan line	22	2	22-May-13	4	50	NA
1	Aurelia N. Japan line	22	3	23-May-13	4	50	0
1	Aurelia N. Japan line	22	4	24-May-13	4	50	0
1	Aurelia N. Japan line	22	5	25-May-13	4	50	0
1	Aurelia N. Japan line	22	6	26-May-13	4	50	0
1	Aurelia N. Japan line	22	7	27-May-13	4	50	0
1	Aurelia N. Japan line	22	8	28-May-13	4	50	0
1	Aurelia N. Japan line	22	9	29-May-13	4	50	1
1	Aurelia N. Japan line	22	0	20-May-13	4	0	0
1	Aurelia N. Japan line	22	1	21-May-13	4	0	NA
1	Aurelia N. Japan line	22	2	22-May-13	4	0	NA
1	Aurelia N. Japan line	22	3	23-May-13	4	0	0
1	Aurelia N. Japan line	22	4	24-May-13	4	0	0
1	Aurelia N. Japan line	22	5	25-May-13	4	0	0
1	Aurelia N. Japan line	22	6	26-May-13	4	0	0
1	Aurelia N. Japan line	22	7	27-May-13	4	0	0
1	Aurelia N. Japan line	22	8	28-May-13	4	0	0
1	Aurelia N. Japan line	22	9	29-May-13	4	0	0
1	Aurelia N. Japan line	22	10	30-May-13	4	0	0
1	Aurelia N. Japan line	22	11	31-May-13	4	0	0
1	Aurelia N. Japan line	22	12	1-Jun-13	4	0	0
1	Aurelia N. Japan line	22	13	2-Jun-13	4	0	0
1	Aurelia N. Japan line	22	14	3-Jun-13	4	0	0
1	Aurelia N. Japan line	22	15	4-Jun-13	4	0	0
1	Aurelia N. Japan line	22	16	5-Jun-13	4	0	0
1	Aurelia N. Japan line	22	17	6-Jun-13	4	0	0
1	Aurelia N. Japan line	22	18	7-Jun-13	4	0	0
1	Aurelia N. Japan line	22	19	8-Jun-13	4	0	0
1	Aurelia N. Japan line	22	20	9-Jun-13	4	0	0
1	Aurelia N. Japan line	22	21	10-Jun-13	4	0	0
1	Aurelia N. Japan line	22	22	11-Jun-13	4	0	0
1	Aurelia N. Japan line	22	23	12-Jun-13	4	0	0
1	Aurelia N. Japan line	22	24	12-Jun-13	4	0	0
2	Chrysaora pacifica	18	0	7-Feb-13	3	0	0
2	Chrysaora pacifica	18	1	8-Feb-13	3	0	0
2	Chrysaora pacifica	18	2	9-Feb-13	3	0	0
2	Chrysaora pacifica	18	3	10-Feb-13	3	0	0
2	Chrysaora pacifica	18	4	11-Feb-13	3	0	0
2	Chrysaora pacifica	18	5	12-Feb-13	3	0	0
2	Chrysaora pacifica	18	6	13-Feb-13	3	0	0
2	Chrysaora pacifica	18	7	14-Feb-13	3	0	0
2	Chrysaora pacifica	18	8	15-Feb-13	3	0	0
2	Chrysaora pacifica	18	9	16-Feb-13	3	0	0
2	Chrysaora pacifica	18	10	17-Feb-13	3	0	0
2	Chrysaora pacifica	18	11	18-Feb-13	3	0	0
2	Chrysaora pacifica	18	12	19-Feb-13	3	0	0
2	Chrysaora pacifica	18	13	20-Feb-13	3	0	0
2	Chrysaora pacifica	18	14	21-Feb-13	3	0	0
2	Chrysaora pacifica	18	15	22-Feb-13	3	0	0
2	Chrysaora pacifica	18	16	23-Feb-13	3	0	0
2	Chrysaora pacifica	18	17	24-Feb-13	3	0	0
2	Chrysaora pacifica	18	0	7-Feb-13	3	50	0
2	Chrysaora pacifica	18	1	8-Feb-13	3	50	0
2	Chrysaora pacifica	18	2	9-Feb-13	3	50	0
2	Chrysaora pacifica	18	3	10-Feb-13	3	50	0
2	Chrysaora pacifica	18	4	11-Feb-13	3	50	0
2	Chrysaora pacifica	18	5	12-Feb-13	3	50	0
2	Chrysaora pacifica	18	6	13-Feb-13	3	50	1
4	Chrysaora quinquecirrha	22	0	7-Feb-13	3	0	0
4	Chrysaora quinquecirrha	22	1	8-Feb-13	3	0	0
4	Chrysaora quinquecirrha	22	2	9-Feb-13	3	0	0
4	Chrysaora quinquecirrha	22	3	10-Feb-13	3	0	0
4	Chrysaora quinquecirrha	22	4	11-Feb-13	3	0	0
4	Chrysaora quinquecirrha	22	5	12-Feb-13	3	0	0
4	Chrysaora quinquecirrha	22	6	13-Feb-13	3	0	0
4	Chrysaora quinquecirrha	22	7	14-Feb-13	3	0	0
4	Chrysaora quinquecirrha	22	8	15-Feb-13	3	0	0
4	Chrysaora quinquecirrha	22	9	16-Feb-13	3	0	0
4	Chrysaora quinquecirrha	22	10	17-Feb-13	3	0	0
4	Chrysaora quinquecirrha	22	11	18-Feb-13	3	0	0
4	Chrysaora quinquecirrha	22	12	19-Feb-13	3	0	0
4	Chrysaora quinquecirrha	22	13	20-Feb-13	3	0	0
4	Chrysaora quinquecirrha	22	14	21-Feb-13	3	0	0
4	Chrysaora quinquecirrha	22	15	22-Feb-13	3	0	0
4	Chrysaora quinquecirrha	22	16	23-Feb-13	3	0	0
4	Chrysaora quinquecirrha	22	17	24-Feb-13	3	0	0
4	Chrysaora quinquecirrha	22	0	7-Feb-13	3	50	0
4	Chrysaora quinquecirrha	22	1	8-Feb-13	3	50	0
4	Chrysaora quinquecirrha	22	2	9-Feb-13	3	50	0
4	Chrysaora quinquecirrha	22	3	10-Feb-13	3	50	0
4	Chrysaora quinquecirrha	22	4	11-Feb-13	3	50	0
4	Chrysaora quinquecirrha	22	5	12-Feb-13	3	50	0
4	Chrysaora quinquecirrha	22	6	13-Feb-13	3	50	0
4	Chrysaora quinquecirrha	22	7	14-Feb-13	3	50	1
5	Aurelia sp. S. Japan line	22	0	7-Feb-13	4	0	0
5	Aurelia sp. S. Japan line	22	1	8-Feb-13	4	0	0
5	Aurelia sp. S. Japan line	22	2	9-Feb-13	4	0	0
5	Aurelia sp. S. Japan line	22	3	10-Feb-13	4	0	0
5	Aurelia sp. S. Japan line	22	4	11-Feb-13	4	0	0
5	Aurelia sp. S. Japan line	22	5	12-Feb-13	4	0	0
5	Aurelia sp. S. Japan line	22	6	13-Feb-13	4	0	0
5	Aurelia sp. S. Japan line	22	7	14-Feb-13	4	0	0
5	Aurelia sp. S. Japan line	22	8	15-Feb-13	4	0	0
5	Aurelia sp. S. Japan line	22	9	16-Feb-13	4	0	0
5	Aurelia sp. S. Japan line	22	10	17-Feb-13	4	0	0
5	Aurelia sp. S. Japan line	22	11	18-Feb-13	4	0	0
5	Aurelia sp. S. Japan line	22	12	19-Feb-13	4	0	0
5	Aurelia sp. S. Japan line	22	13	20-Feb-13	4	0	0
5	Aurelia sp. S. Japan line	22	14	21-Feb-13	4	0	0
5	Aurelia sp. S. Japan line	22	15	22-Feb-13	4	0	0
5	Aurelia sp. S. Japan line	22	16	23-Feb-13	4	0	0
5	Aurelia sp. S. Japan line	22	17	24-Feb-13	4	0	0
5	Aurelia sp. S. Japan line	22	0	7-Feb-13	4	50	0
5	Aurelia sp. S. Japan line	22	1	8-Feb-13	4	50	0
5	Aurelia sp. S. Japan line	22	2	9-Feb-13	4	50	0
5	Aurelia sp. S. Japan line	22	3	10-Feb-13	4	50	0
5	Aurelia sp. S. Japan line	22	4	11-Feb-13	4	50	0
5	Aurelia sp. S. Japan line	22	5	12-Feb-13	4	50	0
5	Aurelia sp. S. Japan line	22	6	13-Feb-13	4	50	0
5	Aurelia sp. S. Japan line	22	7	14-Feb-13	4	50	0
5	Aurelia sp. S. Japan line	22	8	15-Feb-13	4	50	0
5	Aurelia sp. S. Japan line	22	9	16-Feb-13	4	50	0
5	Aurelia sp. S. Japan line	22	10	17-Feb-13	4	50	0
5	Aurelia sp. S. Japan line	22	11	18-Feb-13	4	50	1
6	Chrysaora fuscescens	18	0	7-Feb-13	3	0	0
6	Chrysaora fuscescens	18	1	8-Feb-13	3	0	0
6	Chrysaora fuscescens	18	2	9-Feb-13	3	0	0
6	Chrysaora fuscescens	18	3	10-Feb-13	3	0	0
6	Chrysaora fuscescens	18	4	11-Feb-13	3	0	0
6	Chrysaora fuscescens	18	5	12-Feb-13	3	0	0
6	Chrysaora fuscescens	18	6	13-Feb-13	3	0	0
6	Chrysaora fuscescens	18	7	14-Feb-13	3	0	0
6	Chrysaora fuscescens	18	8	15-Feb-13	3	0	0
6	Chrysaora fuscescens	18	9	16-Feb-13	3	0	0
6	Chrysaora fuscescens	18	10	17-Feb-13	3	0	0
6	Chrysaora fuscescens	18	11	18-Feb-13	3	0	0
6	Chrysaora fuscescens	18	12	19-Feb-13	3	0	0
6	Chrysaora fuscescens	18	13	20-Feb-13	3	0	0
6	Chrysaora fuscescens	18	14	21-Feb-13	3	0	0
6	Chrysaora fuscescens	18	15	22-Feb-13	3	0	0
6	Chrysaora fuscescens	18	16	23-Feb-13	3	0	0
6	Chrysaora fuscescens	18	17	24-Feb-13	3	0	0
6	Chrysaora fuscescens	18	0	7-Feb-13	3	50	0
6	Chrysaora fuscescens	18	1	8-Feb-13	3	50	0
6	Chrysaora fuscescens	18	2	9-Feb-13	3	50	0
6	Chrysaora fuscescens	18	3	10-Feb-13	3	50	0
6	Chrysaora fuscescens	18	4	11-Feb-13	3	50	0
6	Chrysaora fuscescens	18	5	12-Feb-13	3	50	0
6	Chrysaora fuscescens	18	6	13-Feb-13	3	50	0
6	Chrysaora fuscescens	18	7	14-Feb-13	3	50	1
11	Mastigias papua	26.7	0	16-Mar-15	16	50	0
11	Mastigias papua	26.7	1	17-Mar-15	16	50	0
11	Mastigias papua	26.7	2	18-Mar-15	16	50	0
11	Mastigias papua	26.7	3	19-Mar-15	16	50	0
11	Mastigias papua	26.7	4	20-Mar-15	16	50	0
11	Mastigias papua	26.7	5	21-Mar-15	16	50	0
11	Mastigias papua	26.7	6	22-Mar-15	16	50	0
11	Mastigias papua	26.7	7	23-Mar-15	16	50	0
11	Mastigias papua	26.7	8	24-Mar-15	16	50	0
11	Mastigias papua	26.7	9	25-Mar-15	16	50	0
11	Mastigias papua	26.7	10	26-Mar-15	16	50	0
11	Mastigias papua	26.7	11	27-Mar-15	16	50	0
11	Mastigias papua	26.7	12	28-Mar-15	16	50	NA
11	Mastigias papua	26.7	13	29-Mar-15	16	50	NA
11	Mastigias papua	26.7	14	30-Mar-15	16	50	1
11	Mastigias papua	26.7	0	16-Mar-15	16	0	0
11	Mastigias papua	26.7	1	17-Mar-15	16	0	0
11	Mastigias papua	26.7	2	18-Mar-15	16	0	0
11	Mastigias papua	26.7	3	19-Mar-15	16	0	0
11	Mastigias papua	26.7	4	20-Mar-15	16	0	0
11	Mastigias papua	26.7	5	21-Mar-15	16	0	0
11	Mastigias papua	26.7	6	22-Mar-15	16	0	0
11	Mastigias papua	26.7	7	23-Mar-15	16	0	0
11	Mastigias papua	26.7	8	24-Mar-15	16	0	0
11	Mastigias papua	26.7	9	25-Mar-15	16	0	0
11	Mastigias papua	26.7	10	26-Mar-15	16	0	0
11	Mastigias papua	26.7	11	27-Mar-15	16	0	0
11	Mastigias papua	26.7	12	28-Mar-15	16	0	0
11	Mastigias papua	26.7	13	29-Mar-15	16	0	0
11	Mastigias papua	26.7	14	30-Mar-15	16	0	0
